# Supplementary material for: Low frequency magnetic variations at high- β Earth bow shocks
Source: Copernicus journal article supplement (doi:10.5194/angeo-2019-7), 2019-02-05
Supplement: Supplementary file 1 [file angeo-2019-7-supplement.pdf]

| Year | month | date | interval  | X C3, km | Y C3, km | Z C3, km | dX, C3-C4, km | dY, C3-C4, km | dZ, C3-C4, km | B, nT | Ni, cc <sup>-3</sup> | Vx, km/s | T <sub>i</sub> , K | beta | ⊙ <sub>Bn</sub> |
|------|-------|------|-----------|----------|----------|----------|---------------|---------------|---------------|-------|----------------------|----------|--------------------|------|-----------------|
| 2003 | 12    | 31   | 0114-0119 | 34913    | 94800    | 21088    |               |               |               | 2,6   | 11,5                 | -449     | 59109              | 14,4 | 62              |
| 2008 | 1     | 2    | 0850-0855 | 38872    | 104425   | -24685   | 31,1          | 28,0          | 24,5          | 2,4   | 11,9                 | -336     | 16678              | 12,1 | 83              |
| 2008 | 1     | 3    | 1213-1224 | 60288    | 45510    | -73854   | 24,3          | 91,1          | 45,9          | 1,3   | 7,4                  | -326     | 13685              | 27,8 | 54              |
| 2008 | 1     | 3    | 1320-1325 | 58192    | 39727    | -72696   | 24,7          | 92,3          | 42,4          | 1,2   | 7,4                  | -325     | 18847              | 31,9 | 37              |
| 2008 | 1     | 3    | 1420-1425 | 56009    | 34357    | -71282   | 25,2          | 93,1          | 38,8          | 1,2   | 7,6                  | -322     | 12401              | 32,7 | 44              |
| 2008 | 1     | 3    | 1432-1436 | 55508    | 33199    | -70934   | 25,3          | 93,2          | 38,0          | 1,1   | 7,6                  | -321     | 11216              | 39,5 | 47              |
| 2008 | 1     | 4    | 1449-1453 | 33785    | 96811    | -13331   | 34,2          | 23,0          | 13,2          | 2,6   | 14,3                 | -315     | 9417               | 11,7 | 51              |
| 2008 | 1     | 4    | 1455-1459 | 34078    | 97039    | -13669   | 34,1          | 23,2          | 13,6          | 2,7   | 14,1                 | -313     | 9850               | 10,9 | 49              |
| 2008 | 1     | 4    | 1558-1603 | 37528    | 99509    | -17716   | 33,5          | 24,2          | 17,8          | 2,4   | 12,5                 | -313     | 10945              | 12,2 | 39              |
| 2008 | 1     | 4    | 1608-1611 | 37940    | 99779    | -18208   | 33,3          | 24,3          | 18,4          | 2,7   | 12,0                 | -312     | 10788              | 9,4  | 51              |
| 2008 | 1     | 4    | 1620-1623 | 38572    | 100181   | -18967   | 33,2          | 24,6          | 19,2          | 2,3   | 12,6                 | -314     | 12102              | 13,3 | 45              |
| 2008 | 1     | 4    | 1624-1628 | 38778    | 100309   | -19215   | 33,2          | 24,6          | 19,4          | 2,4   | 12,1                 | -314     | 11656              | 12,8 | 48              |
| 2008 | 1     | 4    | 1638-1642 | 39510    | 100754   | -20101   | 33,1          | 25,0          | 20,3          | 2,4   | 12,1                 | -314     | 11656              | 12,8 | 48              |
| 2008 | 1     | 4    | 1644-1648 | 39774    | 100910   | -20422   | 33,0          | 25,1          | 20,7          | 2,4   | 12,1                 | -314     | 11656              | 12,8 | 48              |
| 2011 | 12    | 18   | 1436-1440 | 40843    | 100471   | -65488   | -3,9          | 30,5          | 19,6          | 2,5   | 11,8                 | -263     | 11611              | 10,7 | 46              |
| 2011 | 12    | 18   | 1445-1450 | 41050    | 100211   | -65159   | -4,0          | 30,5          | 19,4          | 2,8   | 12,0                 | -263     | 10238              | 8,5  | 52              |
| 2011 | 12    | 18   | 1503-1506 | 41493    | 99626    | -64430   | -4,4          | 30,5          | 19,1          | 2,2   | 12,9                 | -262     | 9733               | 15,1 | 58              |
| 2011 | 12    | 18   | 1507-1510 | 41599    | 99479    | -64249   | -4,5          | 30,5          | 19,0          | 2,5   | 12,3                 | -262     | 8022               | 11,4 | 55              |
| 2011 | 12    | 18   | 1515-1520 | 41765    | 99246    | -63964   | -4,6          | 30,4          | 18,8          | 2,2   | 11,7                 | -261     | 10406              | 14,2 | 57              |
| 2012 | 2     | 16   | 1358-1402 | 50150    | 44271    | -66984   | 29,7          | -1,2          | 5,2           | 2,0   | 16,3                 | -377     | 26884              | 25,8 | 56              |
| 2012 | 2     | 16   | 1416-1420 | 51675    | 44373    | -67812   | 29,4          | -0,7          | 5,3           | 2,4   | 14,7                 | -376     | 24083              | 14,0 | 79              |
| 2016 | 3     | 21   | 1405-1409 | 46344    | 9387     | -75310   | -106,7        | 88,9          | -82,6         | 2,6   | 12,6                 | -426     | 38027              | 7,4  | 84              |

Table S1 . dates, solar wind parameters and shock geometry for 22 high-beta shocks observed by closely spaced Cluster spacecraft.

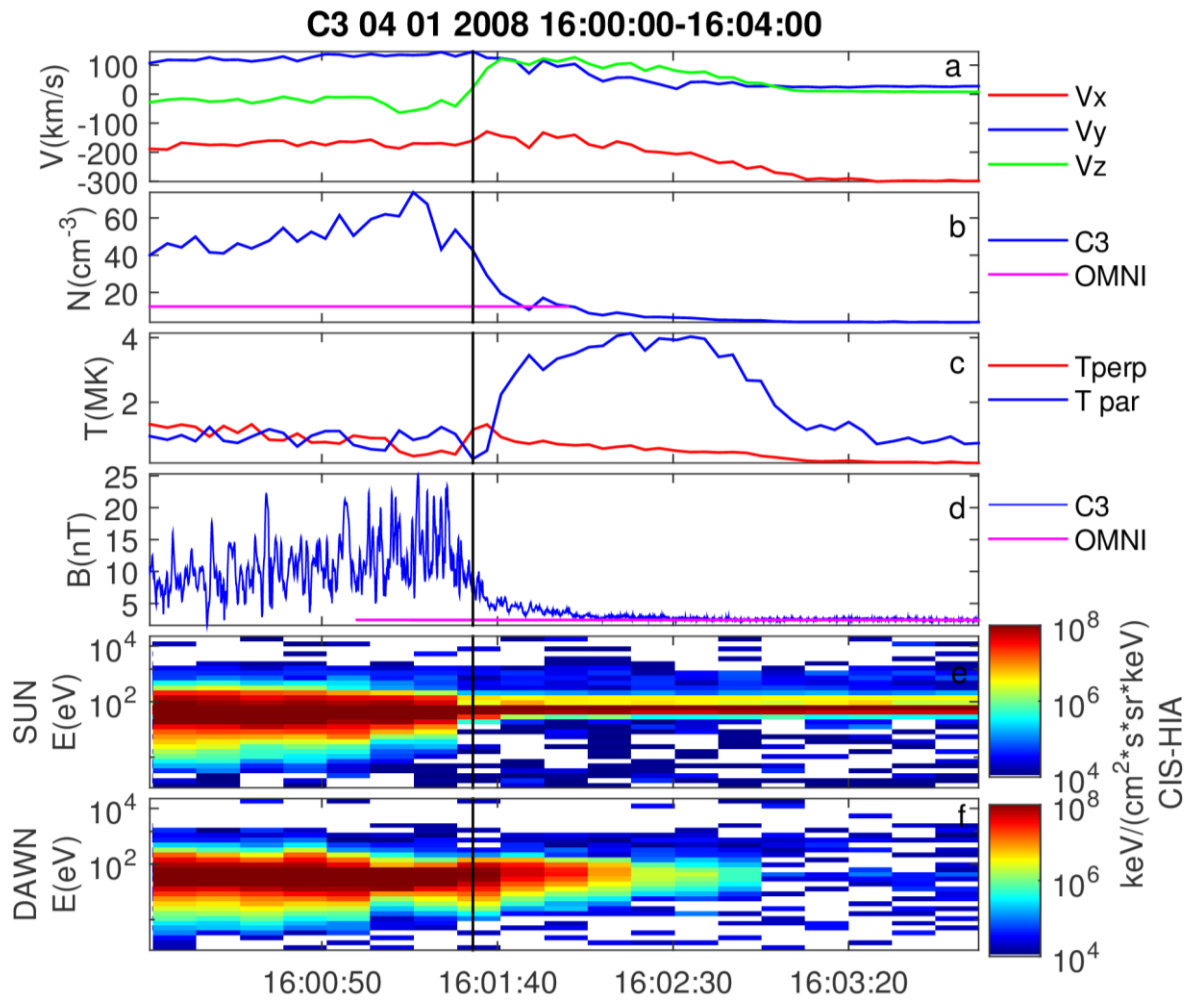

Fig. S1. Overview of C4 magnetic and plasma measurements for event 04 January 2008. (a) proton velocity, (b) proton density and OMNI solar wind density, (c) proton parallel and perpendicular temperature, (d) magnetic field magnitude and OMNI IMF magnitude, (e,f) proton spectrograms for the sunward and dawnward looking sectors.

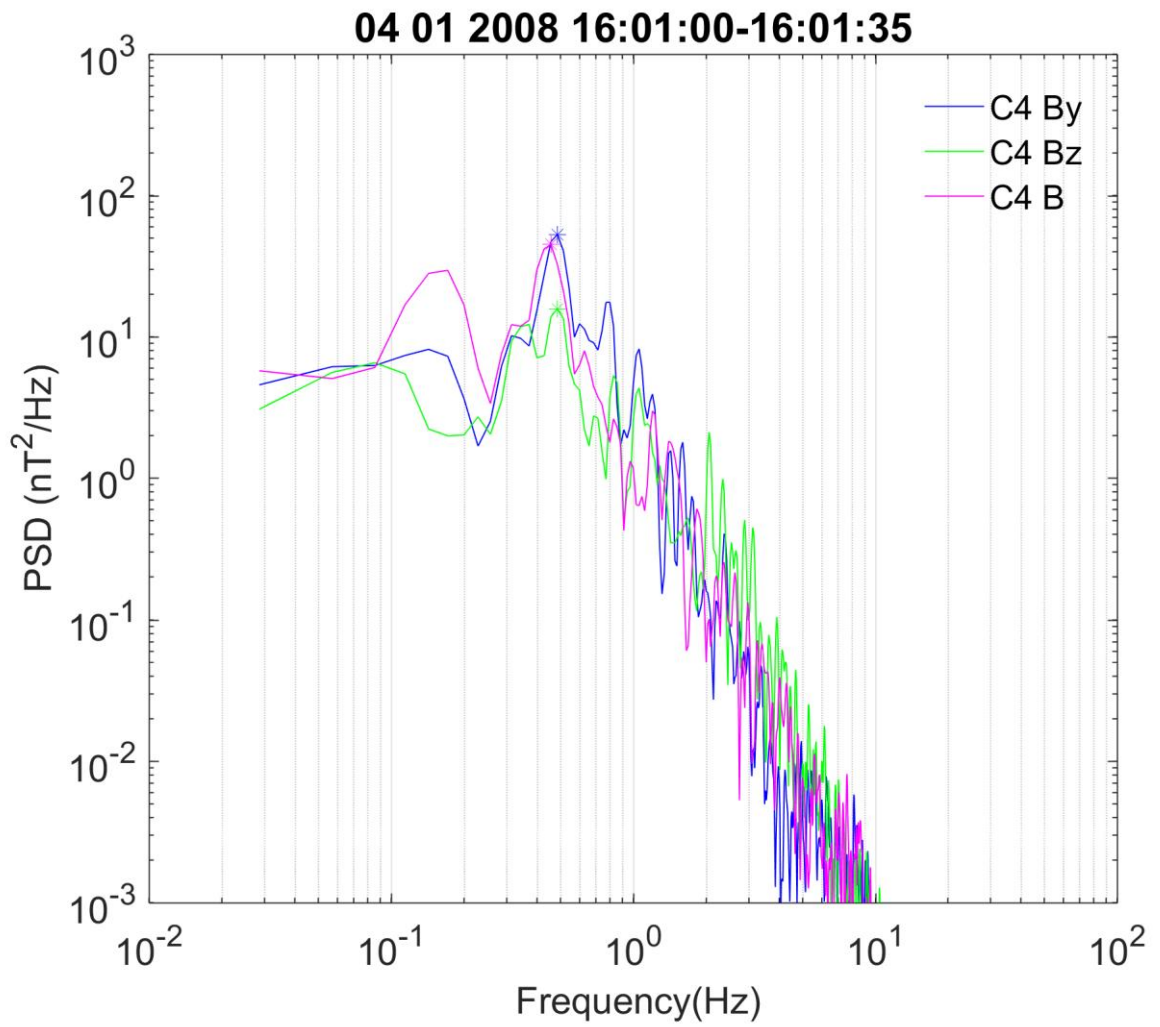

Fig. S2 C4 frequency spectra for By, Bz magnetic components and magnetic field magnitude for shock 04 January 2008.

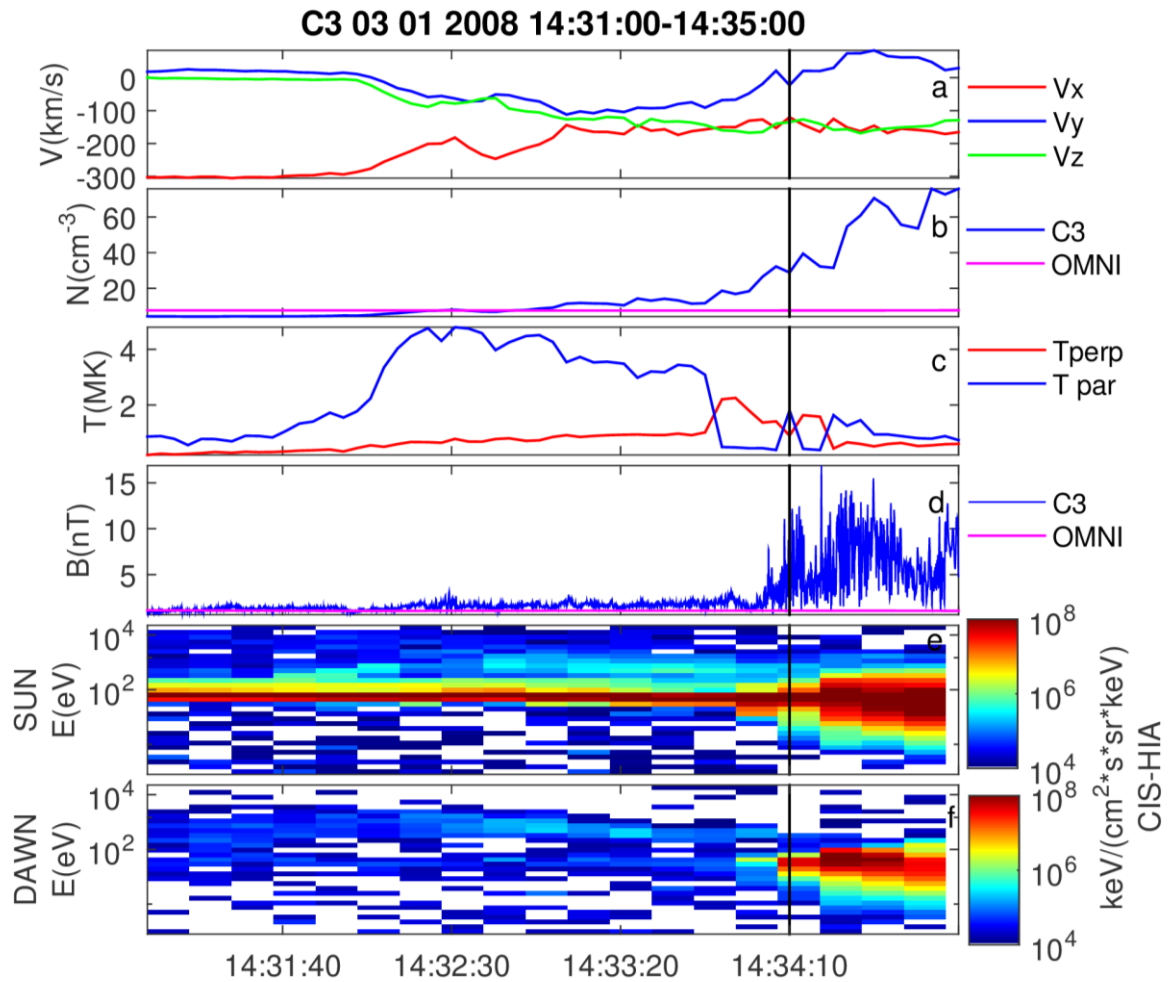

Fig. S3. Overview of C4 magnetic and plasma measurements for event 03 January 2008. (a) proton velocity, (b) proton density and OMNI solar wind density, (c) proton parallel and perpendicular temperature, (d) magnetic field magnitude and OMNI IMF magnitude, (e,f) proton spectrograms for the sunward and dawnward looking sectors.

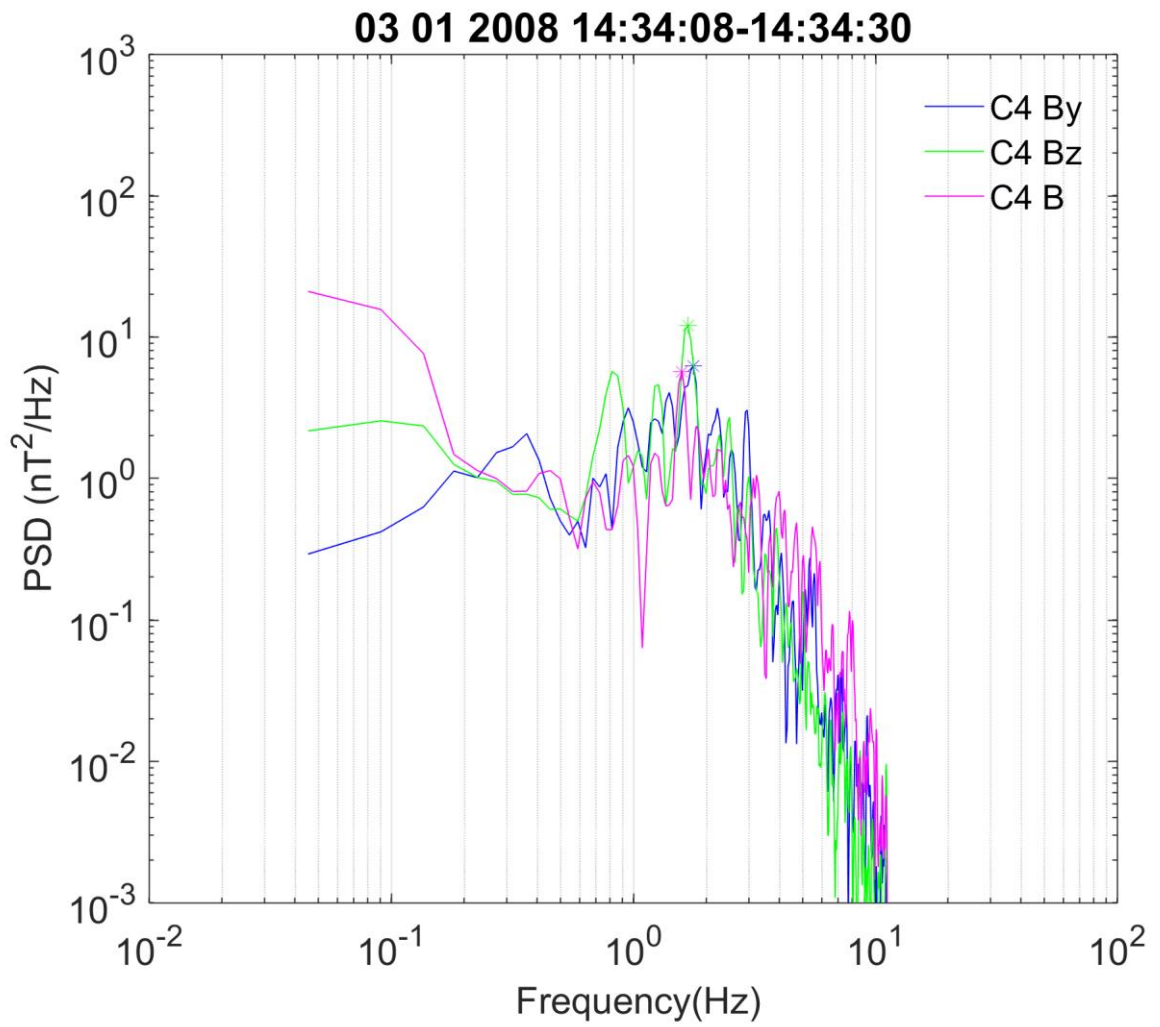

Fig. S4 C4 frequency spectra for By, Bz magnetic components and magnetic field magnitude for shock 03 January 2008.
